# Supplementary material
Source: PubMed Central journal article supplement (PMC2148399)

**A**

average  
growth  
direction

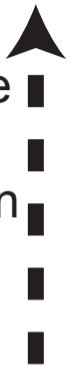**B**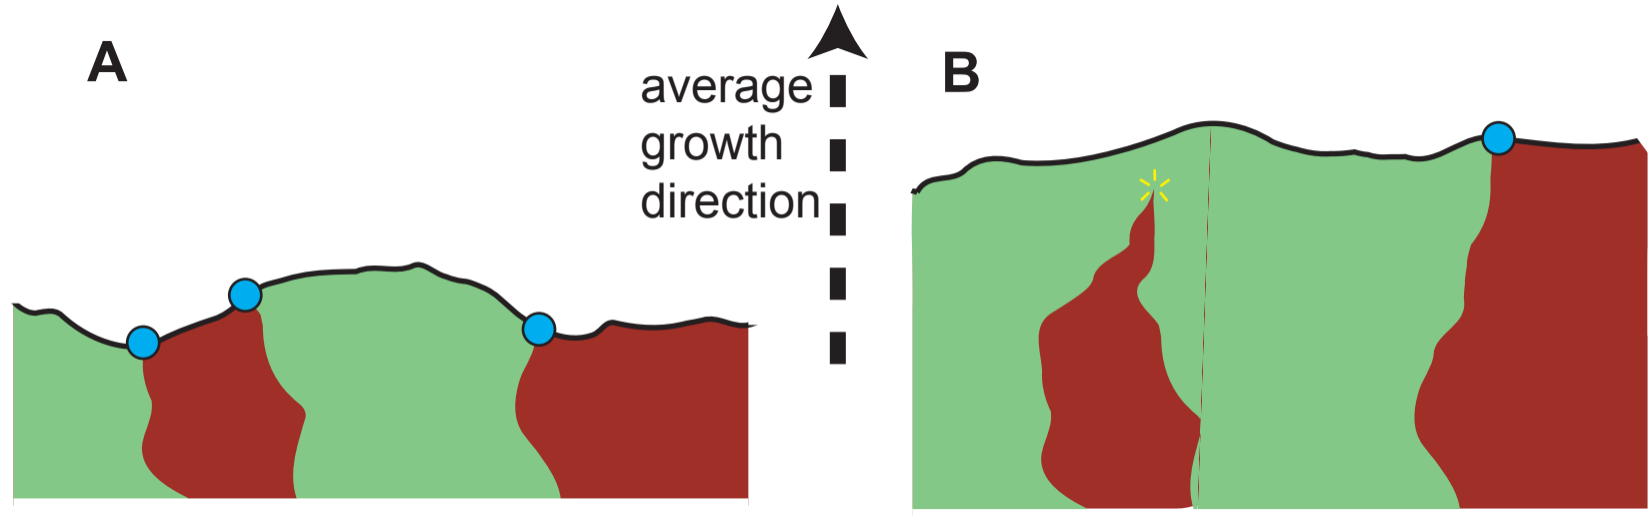

Supplement: pnas_0710150104_4.pdf [file pnas_0710150104_4.pdf]
